# Supplementary material for: Cyclopeptide RA-V Inhibits Organ Enlargement and Tumorigenesis Induced by YAP Activation
Source: MDPI journal article supplement (doi:10.3390/cancers10110449), 2018-11-16

# Supplementary Materials: Cyclopeptide RA-V Inhibits Organ Enlargement and Tumorigenesis Induced by YAP Activation

Xinyan Ji, Lihua Song, Li Sheng, Anhui Gao, Yang Zhao, Shixun Han, Yuchao Zhang, Chu Zhu, Simeng Zhao, Zhe Wang, Bohan Xu, Li Li, Jia Li, Ninghua Tan and Bin Zhao

## Supplementary Figures

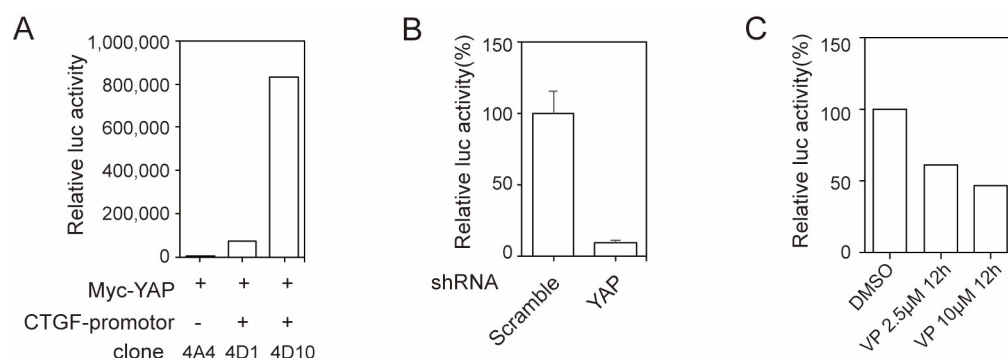

**Figure S1.** Establishment of YAP reporter cell clone. (A) HEK293T clones stably expressing YAP and a luciferase reporter driven by the promoter of CTGF. (B) Knockdown of YAP inhibited reporter activity in cell clone 4D10 from (A). 4D10 cells were infected with scramble or shRNA against YAP. Luciferase activity was then determined. (C) Verteporfin (VP) inhibited reporter activity in cell clone 4D10 from (A). 4D10 cells were treated with VP as indicated. Luciferase activity was then determined.

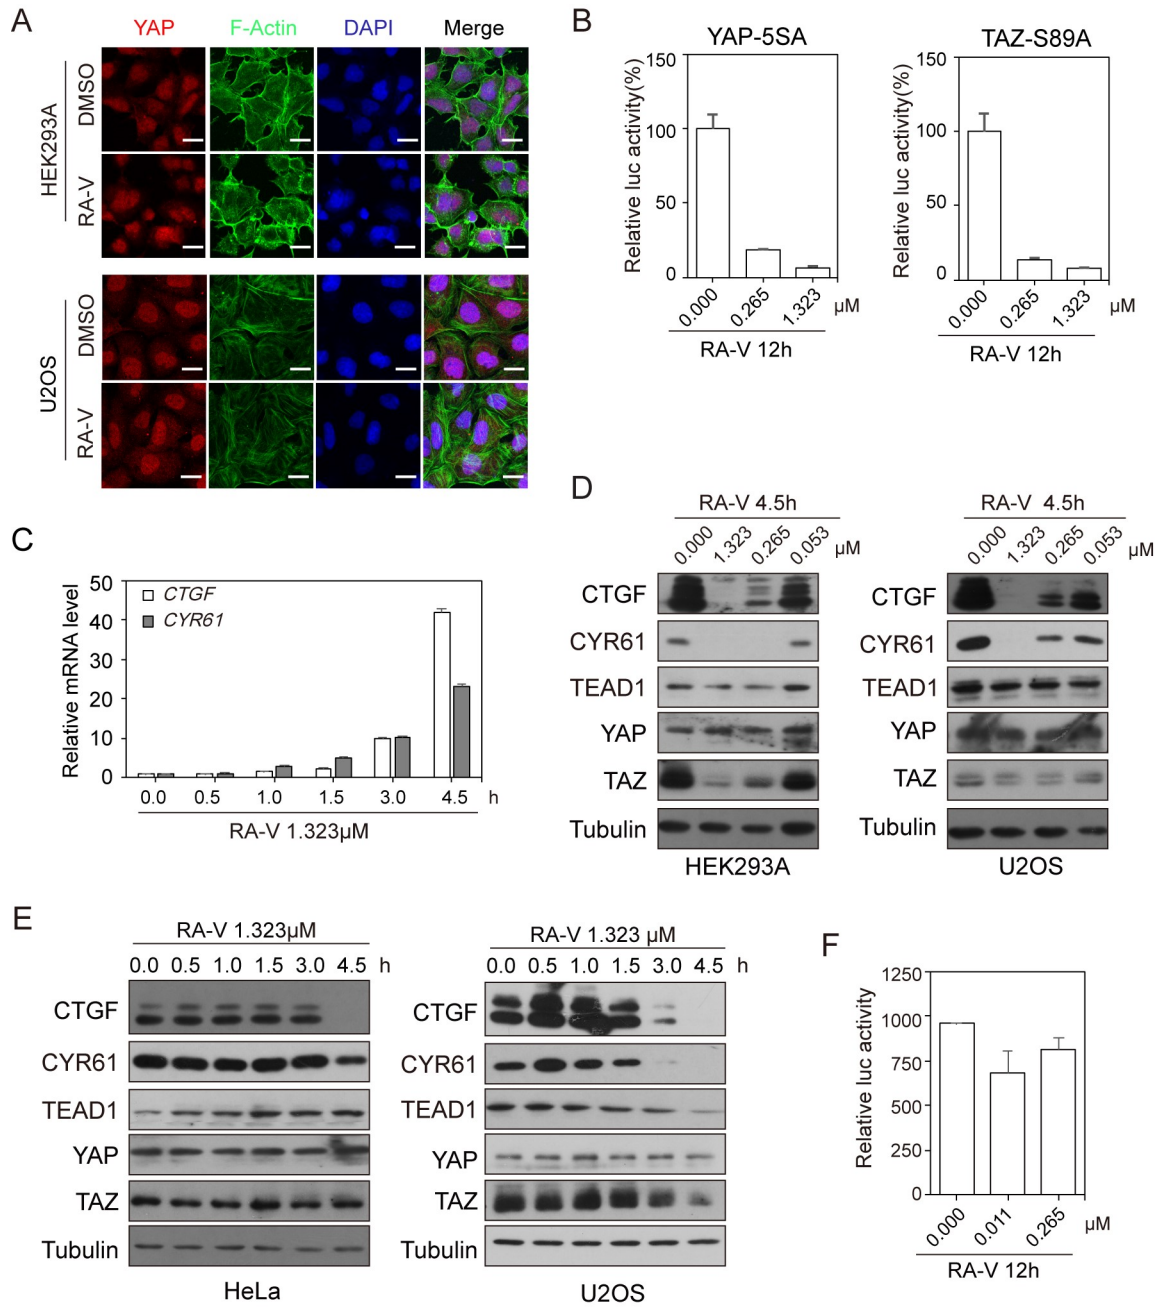

**Figure S2.** RA-V represses the protein levels of YAP target genes. (A) RA-V does not affect YAP subcellular location. HEK293A and U2OS cells were trypsinized and attached again in the presence of DMSO or RA-V at 0.265  $\mu$ M for 4.5 h. Cells were then subjected to immunofluorescence staining. Scale bars, 20  $\mu$ m (B) RA-V inhibits luciferase activity induced by YAP-5SA or TAZ-S89A mutants. HEK293T cells were transfected with YAP-5SA or TAZ-S89A, Gal4-TEAD4, 9  $\times$  UAS-luciferase,  $\beta$ -galactosidase and treated as the indicated for luciferase activity. (C) RA-V induces mRNA expression of *CTGF* and *CYR61* in HeLa cells. Experiments were similar to these in Figure 2E. (D and E) The protein levels of *CTGF* and *CYR61* were repressed by RA-V in a dose-(D) and time-(E) dependent manner. HEK293A, U2OS and HeLa cells were trypsinized and attached again for 4.5 h in the presence of DMSO or RA-V. Cells were then lysed and examined by western blotting. (F) RA-V does not inhibit a Wnt reporter gene. HEK293T cells were transfected with TOP-flash reporter gene, active  $\beta$ -catenin- $\Delta$ N mutant and  $\beta$ -galactosidase. Cells were treated as the indicated for luciferase activity assay.

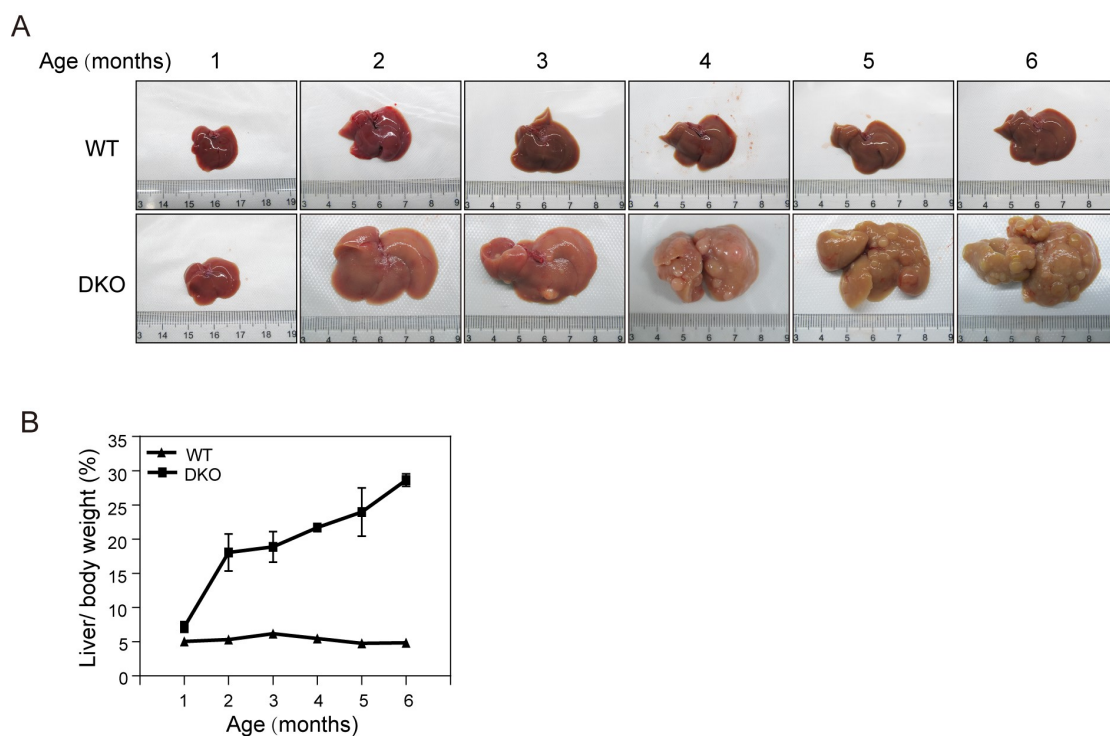

**Figure S3.** *Mst1/2* double knockout induces liver enlargement. (A) Representative pictures of livers from mice at the indicated age. (B) Quantification of liver/body weight ratios ( $n = 4$ ). Values represent mean  $\pm$  SD.

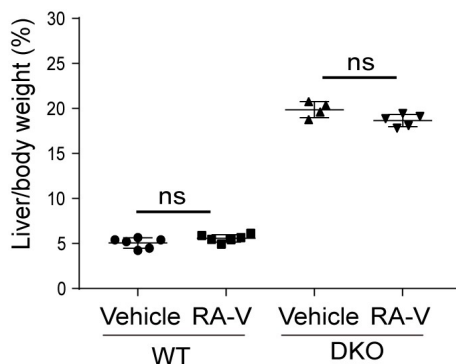

**Figure S4.** Short-term RA-V treatment did not significantly affect liver/body weight ratio. Liver/body weight ratio of wild-type (WT) and *Mst1/2* DKO mice treated with vehicle or RA-V (5 mg/kg) as the schedule shown in Figure 4A. Values represent mean  $\pm$  SD with all data points plotted.  $p$  values were determined by Student's  $t$  test. ns, not significant.

## Supplementary Tables

**Table S1.** List of Antibodies for WB and IHC Analysis.

| No. | Antibody             | Manufacturer              | Catalog Number |
|-----|----------------------|---------------------------|----------------|
| 1   | $\alpha$ -tubulin    | Sigma                     | #T5326         |
| 2   | YAP                  | Santa Cruz                | #sc-15407      |
| 3   | Phospho-YAP S127     | Cell Signaling Technology | #4911          |
| 4   | TEAD                 | BD                        | #610923        |
| 5   | TAZ (V386)           | Cell Signaling Technology | #4883          |
| 6   | CTGF                 | Santa Cruz                | #sc-14939      |
| 7   | CYR61                | Santa Cruz                | #sc-13100      |
| 8   | LATS2                | Bethyl                    | #A300-479A     |
| 9   | Hsp90                | BD                        | #610418        |
| 10  | Flag-tag             | Sigma                     | #F7425         |
| 11  | Myc-tag              | Cell Signaling Technology | #2276          |
| 12  | HNF4a                | PPMX                      | #PP-H1415-00   |
| 13  | phospho-Histone H3   | Cell Signaling Technology | #9701          |
| 14  | Angiomotin           | Bethyl                    | #A303-305A     |
| 15  | Keratin 17/19        | Cell Signaling Technology | #12434         |
| 16  | Cleaved Caspase3     | Cell Signaling Technology | #9664          |
| 17  | Ki67                 | Dako                      | #M7249         |
| 18  | Ki67                 | Abcam                     | #ab16667       |
| 19  | CD45                 | eBioscience               | #11-0451       |
| 20  | Active YAP           | Abcam                     | #R19812        |
| 21  | Phospho-YAP (Ser127) | Cell Signaling Technology | #S13008        |

**Table S2.** List of primers for qPCR analysis.

| Primer       | Primer Sequence        |
|--------------|------------------------|
| hHPRT-RT-F   | ACTGTAATGATCAGTCAACGGG |
| hHPRT-RT-R   | GGCCTGTATCCAACACTTCG   |
| hCTGF-RT-F   | CCAATGACAACGCCTCCTG    |
| hCTGF-RT-R   | TGGTGCAGCCAGAAAAGCTC   |
| hCYR61-RT-F  | AGCCTCGCATCCTATACAACC  |
| hCYR61-RT-R  | TTCTTTCACAAGGCGGCACTC  |
| hAMOTL2-RT-F | GGACACCCTCTCTGGACTCT   |
| hAMOTL2-RT-R | GAAGACAACCTGCCGGAATG   |
| hANKRD1-RT-F | AGCGAGAAACAACGAGAGG    |
| hANKRD1-RT-R | CATCCACAGGTTCCGTAATG   |
| hDIAPH3-RT-F | TCTGCGGTATGCATTGTAGGG  |
| hDIAPH3-RT-R | TGAACTGAATTGTGCCGGAG   |
| hBIRC5-RT-F  | CATTTCGTCGGTTGCGC      |
| hBIRC5-RT-R  | GGCGCACTTTCTCCGCAG     |
| hFOXM1-RT-F  | CACAGCATCATCACAGCAC    |
| hFOXM1-RT-R  | GGTCTCCAGGGTCACTTCT    |
| hTGB2-RT-F   | CCCACACCCTGAAAGTCAC    |
| hTGB2-RT-R   | GCTCCTGGATGCACTCTCTGTG |

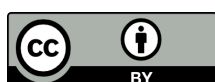

Supplement: s1 [file s1]
